# Supplementary material for: A novel design for porphyrin based D–s–A systems as molecular rectifiers
Source: Royal Society of Chemistry journal article supplement (doi:10.1039/c5sc03590b), 2015-11-16
Supplement: c5sc03590b1.pdf [file c5sc03590b1.pdf]

**Supplementary material**

**Novel design of porphyrin based D-s-A systems as molecular rectifiers**

Kavita Garg,<sup>a\*</sup> Chiranjib Majumder,<sup>b</sup> Dinesh Kumar Aswal,<sup>c</sup> Sandip Kumar Nayak,<sup>a</sup> and Subrata

Chattopadhyay<sup>a</sup>

<sup>a</sup>Bio-Organic Division, <sup>b</sup>Chemistry Division, <sup>c</sup> Technical Physics Division,

Bhabha Atomic Research Centre, Mumbai – 400085, India.

E-mail: [kavitachemistry1@gmail.com](mailto:kavitachemistry1@gmail.com), [dkaswal@yahoo.com](mailto:dkaswal@yahoo.com)

## Content

| s.no | Title                                                                                                                                                 | Page no. |
|------|-------------------------------------------------------------------------------------------------------------------------------------------------------|----------|
| 1    | <b>Figure. SL1.</b> Mechanism of electrochemical deposition                                                                                           | 3        |
| 2    | <b>Figure SL2.</b> Cyclic voltammograms (CVs) of C-11 alkylmonolayers indicating electrografting of the molecules on silicon ( $n^{++}$ ) wafers.     | 3        |
| 3    | <b>Figure SL3.</b> XPS of monolayers of <b>6b</b>                                                                                                     |          |
| 4    | <b>Figure SL4.</b> Experimental <i>I-V</i> characteristics of devices (a) Hg/ undeposited Si( $n^{++}$ ). (b) Hg/ C-11alkyl monolayers/Si( $n^{++}$ ) | 3        |
| 5    | <b>Figure SL5.</b> The optimized geometry of the 5b-congener that has alkenyl group at the porphyrin ring.                                            | 4        |
| 6    | Input file for p-aminophenol                                                                                                                          | 5        |
| 7    | Input file for tetraphenylporphyrin                                                                                                                   | 6        |
| 8    | Input file for <b>5b</b>                                                                                                                              | 8        |
| 9    | Input file for <b>5b</b> -congener that has alkenyl group at the porphyrin ring                                                                       | 11       |

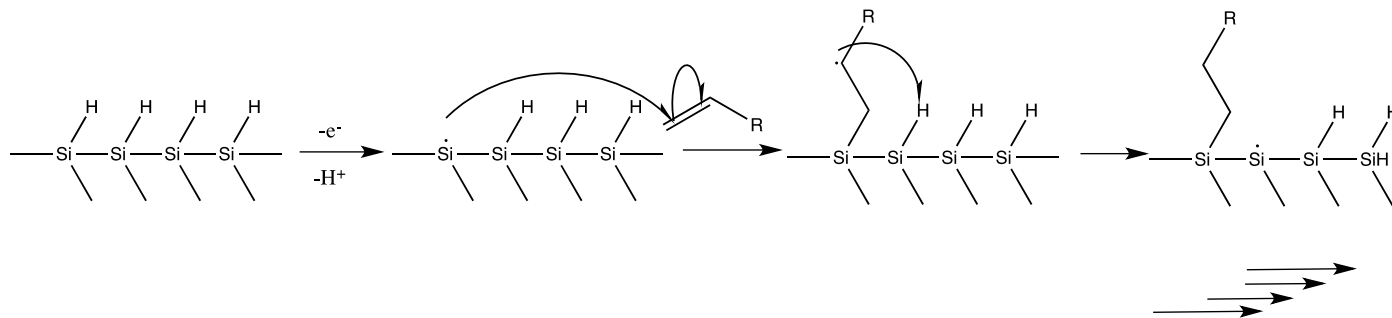

Figure. SL1. Monolayer deposition mechanism

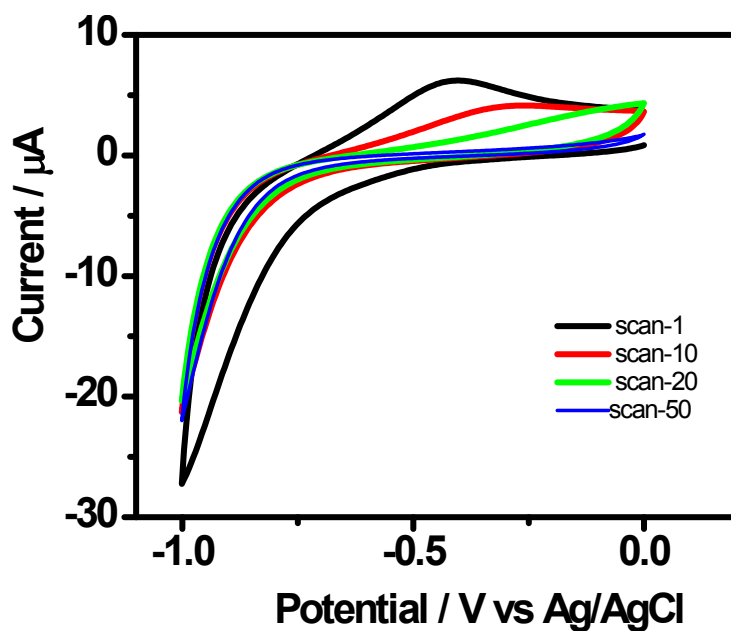

Figure SL-2 Cyclic voltammograms (CVs) of C-11 alkylmonolayers indicating electrografting of the molecules on silicon ( $n^{++}$ ) wafers.

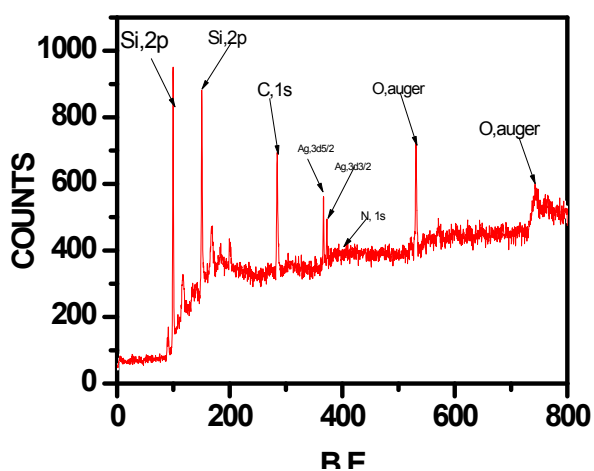

Figure SL3. XPS of monolayers of 6b

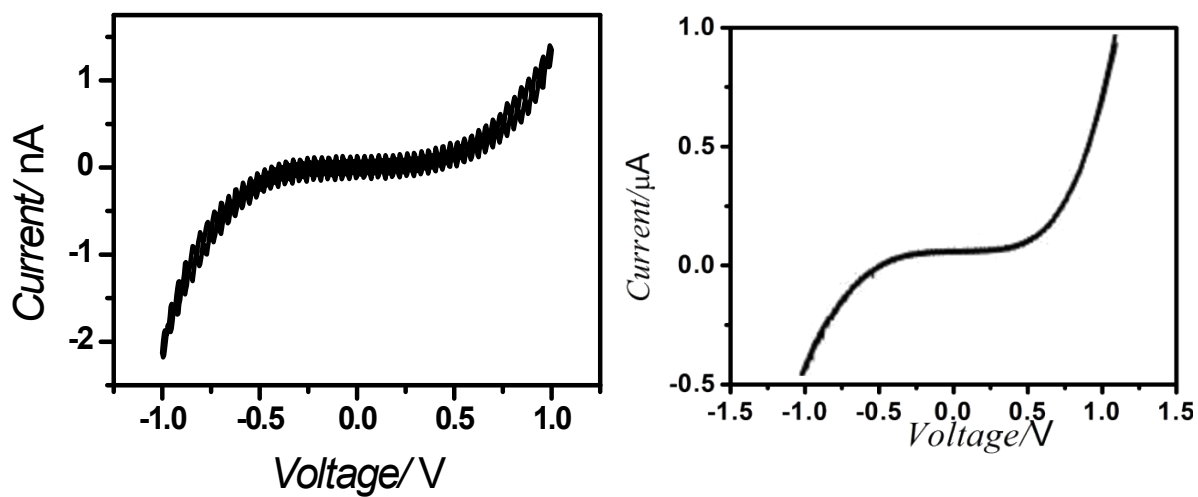

**Figure SL-4.** Experimental  $I$ - $V$  characteristics of devices (a) Hg/ undeposited Si( $n^{++}$ ). (b) Hg/ C-11alkyl monolayers/Si( $n^{++}$ )

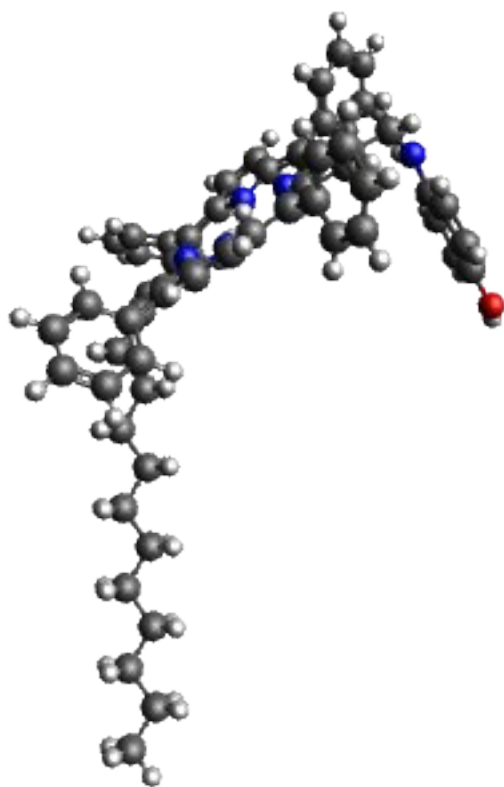

**Figure SL-5.** The optimized geometry of the **5b**-congener that has alkenyl group at the porphyrin ring.

## Input file for p-aminophenol

```
$SYSTEM TIMLIM=600000.0 MEMORY=51200000 $SEND
$CONTRL SCFTYP=RHF MLEVEL=0 MAXIT=200 ICHARG=0 MULT=1 COORD=CART
RUNTYP=OPTIMIZE DFTTYP=B3LYP QMTTOL=1.0E-06 MLEVEL=0 $SEND
$STATPT NSTEP=400 OPTTOL=0.0001 $SEND
$SCF DIRSCF=.T. SHIFT=.T. DAMP=.T. DIIS=.T. CONV=1.0d-04 $SEND
# $DFT DFTTYP=B3LYP METHOD=GRID $SEND
$BASIS GBASIS=N31 NGAUSS=6 NDFUNC=1 NPFUNC=0 DIFFSP=.F. DIFFS=.F. $SEND
$DATA
DMS:/B3LYP/6-31++G(d,p)/acn
C1
C 6.0 0.68659 1.19949 -0.00622
C 6.0 -0.70313 1.21419 -0.00025
C 6.0 -1.41775 0.01743 0.00241
C 6.0 -0.72317 -1.19015 -0.00025
C 6.0 0.67066 -1.20182 -0.00567
C 6.0 1.39935 -0.00785 -0.00668
H 1.0 1.22766 2.14042 -0.01545
H 1.0 -1.24623 2.15171 0.00174
H 1.0 -1.26565 -2.13139 0.00246
H 1.0 1.19419 -2.15250 -0.01428
O 8.0 -2.79223 0.09349 0.00961
H 1.0 -3.16377 -0.79407 0.00208
N 7.0 2.80400 -0.01587 -0.07606
H 1.0 3.24865 0.81309 0.29217
H 1.0 3.23975 -0.85185 0.28685
$SEND
```

# Input file for Tetraphenylporphyrin

```
$SYSTEM TIMLIM=600000.0 MEMORY=51200000 $END
$CONTRL SCFTYP=RHF MLEVEL=0 MAXIT=200 ICHARG=0 MULT=1 COORD=CART
RUNTYP=OPTIMIZE DFTTYP=B3LYP QMTTOL=1.0E-06 MLEVEL=0 $END
$STATPT NSTEP=400 OPTTOL=0.0001 $END
$SCF DIRSCF=.T. SHIFT=.T. DAMP=.T. DIIS=.T. CONV=1.0d-04 $END
# $DFT DFTTYP=B3LYP METHOD=GRID $END
$BASIS GBASIS=N31 NGAUSS=6 NDFUNC=1 NPFUNC=0 DIFFSP=.F. DIFFS=.F. $END
$DATA
C1
C 6.0 1.36337 2.78531 0.01344
C 6.0 1.02475 4.17834 0.00310
C 6.0 -0.33925 4.28546 -0.00075
C 6.0 -0.89108 2.96275 0.00492
N 7.0 0.17488 2.09410 0.01669
C 6.0 2.65093 2.23228 0.00537
C 6.0 -2.24943 2.62140 -0.01130
C 6.0 -2.76342 1.31087 -0.01458
C 6.0 -4.19233 1.01588 -0.04271
C 6.0 -4.30382 -0.33217 -0.03901
C 6.0 -2.94265 -0.85747 -0.00601
N 7.0 -2.03185 0.15903 0.00460
C 6.0 -2.64821 -2.23420 0.00120
C 6.0 -1.36061 -2.78745 0.00192
C 6.0 -1.02196 -4.17990 0.02860
C 6.0 0.34220 -4.28694 0.02489
C 6.0 0.89367 -2.96430 -0.00144
N 7.0 -0.17231 -2.09601 -0.01626
C 6.0 2.25222 -2.62303 -0.00513
C 6.0 2.76640 -1.31270 -0.01155
C 6.0 4.19555 -1.01791 -0.00760
C 6.0 4.30741 0.32998 0.00308
C 6.0 2.94599 0.85564 -0.00707
N 7.0 2.03482 -0.16056 -0.01290
C 6.0 3.79699 3.20237 0.01279
C 6.0 4.49924 3.48464 -1.16470
C 6.0 5.55713 4.39272 -1.16135
C 6.0 5.92735 5.03145 0.02099
C 6.0 5.23574 4.75629 1.19942
C 6.0 4.17678 3.84918 1.19417
H 1.0 1.74354 4.98123 -0.00417
H 1.0 -0.92429 5.19067 -0.01141
H 1.0 -4.98563 1.74632 -0.06758
H 1.0 -5.20633 -0.92244 -0.06239
H 1.0 -1.74048 -4.98272 0.05344
H 1.0 0.92736 -5.19184 0.04521
H 1.0 4.98918 -1.74846 -0.00543
H 1.0 5.21041 0.91980 0.01551
H 1.0 4.21117 2.99084 -2.08616
H 1.0 6.08919 4.60296 -2.08255
H 1.0 5.52052 5.24597 2.12407
```

|   |     |          |          |          |
|---|-----|----------|----------|----------|
| H | 1.0 | 3.64116  | 3.63509  | 2.11243  |
| C | 6.0 | -3.22553 | 3.76302  | -0.03116 |
| C | 6.0 | -3.70809 | 4.31097  | 1.16253  |
| C | 6.0 | -3.66945 | 4.29802  | -1.24581 |
| C | 6.0 | -4.61749 | 5.36773  | 1.14278  |
| H | 1.0 | -3.37022 | 3.90311  | 2.10886  |
| C | 6.0 | -4.57919 | 5.35430  | -1.26692 |
| H | 1.0 | -3.30037 | 3.88052  | -2.17609 |
| C | 6.0 | -5.05579 | 5.89172  | -0.07224 |
| H | 1.0 | -4.98343 | 5.78009  | 2.07665  |
| H | 1.0 | -4.91474 | 5.75658  | -2.21645 |
| H | 1.0 | -5.76334 | 6.71318  | -0.08801 |
| C | 6.0 | 3.22821  | -3.76491 | 0.00698  |
| C | 6.0 | 3.71848  | -4.27045 | 1.21645  |
| C | 6.0 | 3.66176  | -4.34478 | -1.19042 |
| C | 6.0 | 4.62483  | -5.32976 | 1.22845  |
| H | 1.0 | 3.38796  | -3.82802 | 2.14972  |
| C | 6.0 | 4.56882  | -5.40370 | -1.17980 |
| H | 1.0 | 3.28724  | -3.96019 | -2.13268 |
| C | 6.0 | 5.05256  | -5.89900 | 0.02999  |
| H | 1.0 | 4.99612  | -5.70954 | 2.17395  |
| H | 1.0 | 4.89659  | -5.84073 | -2.11662 |
| H | 1.0 | 5.75786  | -6.72248 | 0.03888  |
| C | 6.0 | -3.79438 | -3.20367 | 0.01381  |
| C | 6.0 | -4.49405 | -3.46316 | 1.19785  |
| C | 6.0 | -4.18442 | -3.86454 | -1.15686 |
| C | 6.0 | -5.55893 | -4.36284 | 1.21193  |
| H | 1.0 | -4.19923 | -2.95647 | 2.11007  |
| C | 6.0 | -5.25070 | -4.76266 | -1.14448 |
| H | 1.0 | -3.65243 | -3.66661 | -2.08086 |
| C | 6.0 | -5.94069 | -5.01451 | 0.04031  |
| H | 1.0 | -6.08912 | -4.55402 | 2.13842  |
| H | 1.0 | -5.54343 | -5.26267 | -2.06120 |
| H | 1.0 | -6.76994 | -5.71300 | 0.05031  |
| H | 1.0 | -0.09621 | -1.08595 | -0.02220 |
| H | 1.0 | 0.09840  | 1.08407  | 0.02253  |
| H | 1.0 | 6.75013  | 5.73725  | 0.02439  |

\$END

## Input file for 5b

```
$SYSTEM TIMLIM=600000.0 MEMORY=51200000 $SEND
$CONTRL SCFTYP=RHF MLEVEL=0 MAXIT=200 ICHARG=0 MULT=1 COORD=CART
RUNTYP=OPTIMIZE DFTTYP=B3LYP QMTTOL=1.0E-06 MLEVEL=0 $SEND
$STATPT NSTEP=400 OPTTOL=0.0001 $SEND
$SCF DIRSCF=.T. SHIFT=.T. DAMP=.T. DIIS=.T. CONV=1.0d-04 $SEND
# $DFT DFTTYP=B3LYP METHOD=GRID $SEND
$BASIS GBASIS=N31 NGAUSS=6 NDFUNC=1 NPFUNC=0 DIFFSP=.F. DIFFS=.F. $SEND
$DATA
DMS:/B3LYP/6-31++G(d,p)/acn
CN 1
```

```
C 6.0 -6.058288 -2.806362 7.872034
C 6.0 -5.370036 -4.173284 7.575187
C 6.0 -4.269261 -4.212230 6.733858
C 6.0 -4.317106 -2.914990 6.248166
N 7.0 -5.063229 -2.055086 7.139670
C 6.0 -7.380109 -2.389462 7.872034
C 6.0 -3.736519 -2.499647 5.060131
C 6.0 -3.836278 -1.174564 4.666150
C 6.0 -3.292818 -0.659268 3.499900
C 6.0 -3.559769 0.695837 3.383949
C 6.0 -4.294562 1.151793 4.467093
N 7.0 -4.461744 -0.251237 5.336894
C 6.0 -4.410467 2.512766 4.702332
C 6.0 -5.373848 2.984789 5.579891
C 6.0 -5.571425 4.322680 5.883253
C 6.0 -6.852684 4.232088 7.193619
C 6.0 -6.909360 2.862494 7.398601
N 7.0 -6.314013 2.147772 6.291512
C 6.0 -7.472078 2.257942 8.511652
C 6.0 -7.488710 0.875935 8.615559
C 6.0 -8.118640 0.172482 9.630133
C 6.0 -8.954939 -0.723930 8.316916
C 6.0 -7.679974 -1.036282 7.872034
N 7.0 -6.923949 0.066159 7.767652
C 6.0 -3.570840 3.402582 4.050973
C 6.0 -3.066376 -3.411858 4.260259
C 6.0 -8.402027 -3.325708 7.884036
C 6.0 -8.028789 3.035080 9.515219
C 6.0 -2.976829 -4.739384 4.648426
C 6.0 -2.316933 -5.653976 3.842774
C 6.0 -1.746583 -5.241042 2.648955
C 6.0 -1.836127 -3.913566 2.260802
C 6.0 -2.496017 -2.998952 3.066434
C 6.0 -2.615329 2.931421 3.164393
C 6.0 -1.783625 3.822062 2.504056
C 6.0 -1.907432 5.183863 2.730298
C 6.0 -2.862907 5.655007 3.616845
C 6.0 -3.694624 4.764389 4.277196
C 6.0 -8.022774 4.416743 9.405725
C 6.0 -8.590075 5.193480 10.403657
```



|   |     |            |           |            |
|---|-----|------------|-----------|------------|
| C | 6.0 | -9.163390  | 4.588554  | 11.511082  |
| C | 6.0 | -9.169405  | 3.206943  | 11.620572  |
| C | 6.0 | -8.602111  | 2.430181  | 10.622656  |
| C | 6.0 | -9.723858  | -2.908838 | 7.884037   |
| C | 6.0 | -10.745794 | -3.845141 | 7.884037   |
| C | 6.0 | -10.445899 | -5.198315 | 7.884037   |
| C | 6.0 | -9.124118  | -5.615171 | 7.884036   |
| C | 6.0 | -8.102162  | -4.678889 | 7.884036   |
| C | 6.0 | -3.113099  | 1.574722  | 2.200871   |
| N | 7.0 | -2.382853  | 0.767756  | 1.248788   |
| C | 6.0 | -1.856365  | 1.369910  | 0.044158   |
| C | 6.0 | -0.493073  | 1.344695  | -0.204473  |
| C | 6.0 | 0.010337   | 1.911386  | -1.364843  |
| C | 6.0 | -0.849546  | 2.503292  | -2.276581  |
| C | 6.0 | -2.212786  | 2.528506  | -2.027960  |
| C | 6.0 | -2.716223  | 1.961823  | -0.867598  |
| O | 8.0 | -0.338689  | 3.069080  | -3.462760  |
| C | 6.0 | 1.061998   | 2.910433  | -3.494673  |
| C | 6.0 | 1.619957   | 3.528388  | -4.790220  |
| C | 6.0 | 3.149789   | 3.355113  | -4.825076  |
| C | 6.0 | 3.707748   | 3.973068  | -6.120622  |
| C | 6.0 | 5.237580   | 3.799793  | -6.155478  |
| C | 6.0 | 5.795539   | 4.417748  | -7.451024  |
| C | 6.0 | 7.325372   | 4.244473  | -7.485880  |
| C | 6.0 | 7.883330   | 4.862428  | -8.781427  |
| C | 6.0 | 9.413163   | 4.689153  | -8.816283  |
| C | 6.0 | 9.971122   | 5.307108  | -10.111829 |
| C | 6.0 | 10.632514  | 4.550911  | -10.974836 |
| H | 1.0 | -5.809731  | -5.086797 | 8.055845   |
| H | 1.0 | -3.456588  | -4.889063 | 6.359249   |
| H | 1.0 | -4.900624  | -1.045680 | 7.246499   |
| H | 1.0 | -2.722600  | -1.261561 | 2.744277   |
| H | 1.0 | -5.154659  | 5.295991  | 5.511982   |
| H | 1.0 | -7.545711  | 4.859773  | 7.813777   |
| H | 1.0 | -6.523345  | 1.170958  | 6.049093   |
| H | 1.0 | -8.349633  | -0.078706 | 10.698972  |
| H | 1.0 | -9.981826  | -0.966440 | 7.935389   |
| H | 1.0 | -3.446838  | -5.075565 | 5.610166   |
| H | 1.0 | -2.252766  | -6.730505 | 4.152351   |
| H | 1.0 | -1.220727  | -5.983308 | 1.992154   |
| H | 1.0 | -1.382753  | -3.581232 | 1.289783   |
| H | 1.0 | -2.576811  | -1.926263 | 2.747560   |
| H | 1.0 | -2.521538  | 1.829685  | 2.973994   |
| H | 1.0 | -1.016583  | 3.441286  | 1.779124   |
| H | 1.0 | -1.240610  | 5.905445  | 2.188506   |
| H | 1.0 | -2.969547  | 6.757988  | 3.792718   |
| H | 1.0 | -4.474517  | 5.146431  | 4.987605   |
| H | 1.0 | -7.567234  | 4.906093  | 8.504676   |
| H | 1.0 | -8.593755  | 6.311587  | 10.310417  |
| H | 1.0 | -9.631160  | 5.216983  | 12.314287  |
| H | 1.0 | -9.642047  | 2.716948  | 12.512416  |
| H | 1.0 | -8.615541  | 1.311420  | 10.706706  |
| H | 1.0 | -9.966618  | -1.813464 | 7.874320   |

|   |     |            |           |            |
|---|-----|------------|-----------|------------|
| H | 1.0 | -11.815795 | -3.507690 | 7.874321   |
| H | 1.0 | -11.273141 | -5.956239 | 7.874320   |
| H | 1.0 | -8.881370  | -6.710547 | 7.874320   |
| H | 1.0 | -7.032168  | -5.016363 | 7.874320   |
| H | 1.0 | -2.452809  | 2.400584  | 2.576155   |
| H | 1.0 | -4.015097  | 2.018032  | 1.702125   |
| H | 1.0 | -2.245602  | -0.235832 | 1.424071   |
| H | 1.0 | 0.201995   | 0.857048  | 0.528979   |
| H | 1.0 | 1.112906   | 1.882466  | -1.570692  |
| H | 1.0 | -2.909832  | 2.999140  | -2.770591  |
| H | 1.0 | -3.820784  | 1.973738  | -0.670942  |
| H | 1.0 | 1.316062   | 1.818099  | -3.461080  |
| H | 1.0 | 1.517515   | 3.425076  | -2.607816  |
| H | 1.0 | 1.365893   | 4.620722  | -4.823813  |
| H | 1.0 | 1.164439   | 3.013744  | -5.677077  |
| H | 1.0 | 3.403853   | 2.262779  | -4.791482  |
| H | 1.0 | 3.605307   | 3.869756  | -3.938218  |
| H | 1.0 | 3.453684   | 5.065402  | -6.154216  |
| H | 1.0 | 3.252230   | 3.458424  | -7.007480  |
| H | 1.0 | 5.491644   | 2.707459  | -6.121884  |
| H | 1.0 | 5.693098   | 4.314437  | -5.268621  |
| H | 1.0 | 5.541475   | 5.510082  | -7.484618  |
| H | 1.0 | 5.340022   | 3.903104  | -8.337882  |
| H | 1.0 | 7.579435   | 3.152139  | -7.452287  |
| H | 1.0 | 7.780889   | 4.759117  | -6.599023  |
| H | 1.0 | 7.629266   | 5.954762  | -8.815020  |
| H | 1.0 | 7.427813   | 4.347784  | -9.668284  |
| H | 1.0 | 9.667227   | 3.596819  | -8.782689  |
| H | 1.0 | 9.868680   | 5.203797  | -7.929425  |
| H | 1.0 | 9.825649   | 6.399976  | -10.320029 |
| H | 1.0 | 11.039023  | 5.001130  | -11.918723 |
| H | 1.0 | 10.777987  | 3.458043  | -10.766636 |

\$END

Input file for **5b**-congener that has alkenyl group at the porphyrin ring

```
$SYSTEM TIMLIM=600000.0 MEMORY=51200000 $SEND
$CONTRL SCFTYP=RHF MLEVEL=0 MAXIT=200 ICHARG=0 MULT=1 COORD=CART
RUNTYP=OPTIMIZE DFTTYP=B3LYP QMTTOL=1.0E-06 MLEVEL=0 $SEND
$STATPT NSTEP=400 OPTTOL=0.0001 $SEND
$SCF DIRSCF=.T. SHIFT=.T. DAMP=.T. DIIS=.T. CONV=1.0d-04 $SEND
# $DFT DFTTYP=B3LYP METHOD=GRID $SEND
$BASIS GBASIS=N31 NGAUSS=6 NDFUNC=1 NPFUNC=0 DIFFSP=.F. DIFFS=.F. $SEND
$DATA
DMS:/B3LYP/6-31++G(d,p)/acn
```

```
C1
C 6.0 4.18044 0.75782 0.13186
C 6.0 4.37062 -0.52929 -0.10911
C 6.0 2.88782 -0.96559 -0.10602
N 7.0 2.06648 0.07975 -0.01408
C 6.0 2.85024 1.20565 0.10307
C 6.0 -0.60399 4.09150 -0.16199
C 6.0 0.71566 4.11189 -0.28132
C 6.0 1.14754 2.85793 0.02466
N 7.0 0.04313 2.01604 0.08591
C 6.0 -1.05852 2.82602 0.11320
C 6.0 2.51017 2.50571 0.18505
C 6.0 -4.25164 -0.67533 0.27685
C 6.0 -4.35197 0.63540 0.11165
C 6.0 -2.93864 1.21721 0.14846
N 7.0 -2.10903 0.07321 0.07278
C 6.0 -2.86183 -0.99712 0.16886
C 6.0 -2.42589 2.50764 0.27094
C 6.0 0.53445 -4.05015 -0.20454
C 6.0 -0.74720 -4.02924 -0.25763
C 6.0 -1.20993 -2.71851 -0.00896
N 7.0 -0.07359 -1.95158 0.04871
C 6.0 1.02271 -2.71835 -0.04850
C 6.0 2.33235 -2.45886 -0.08430
C 6.0 -2.51687 -2.46589 0.11616
C 6.0 -3.22197 3.84866 0.22025
C 6.0 3.51512 3.68556 0.25171
C 6.0 2.98435 -3.78199 -0.11871
C 6.0 -3.41852 -3.69499 0.09399
C 6.0 -4.30827 3.57269 -0.25424
C 6.0 -4.99853 4.30731 -1.35429
C 6.0 -4.84033 5.61966 -1.36163
C 6.0 -3.90098 6.11274 -0.46442
C 6.0 -3.10998 5.21439 0.29593
C 6.0 3.18384 4.98946 0.67929
C 6.0 3.87806 6.11439 0.19949
C 6.0 5.16224 5.94221 -0.26470
C 6.0 5.64224 4.65491 -0.37142
```

|   |     |          |           |          |
|---|-----|----------|-----------|----------|
| C | 6.0 | 4.76868  | 3.59506   | -0.33914 |
| C | 6.0 | 4.22722  | -3.63384  | -0.36130 |
| C | 6.0 | 4.75878  | -4.37419  | -1.35734 |
| C | 6.0 | 4.57030  | -5.72002  | -1.14847 |
| C | 6.0 | 3.79559  | -6.07300  | -0.08045 |
| C | 6.0 | 2.91030  | -5.11570  | 0.33967  |
| C | 6.0 | -3.12994 | -4.98852  | 0.46901  |
| C | 6.0 | -3.85562 | -6.09225  | 0.05300  |
| C | 6.0 | -5.15981 | -5.89212  | -0.31711 |
| C | 6.0 | -5.61839 | -4.60006  | -0.44697 |
| C | 6.0 | -4.70859 | -3.56879  | -0.47292 |
| C | 6.0 | -5.85665 | 0.93472   | -0.04060 |
| N | 7.0 | -6.33497 | 2.20639   | -0.45761 |
| C | 6.0 | -7.01624 | 3.19195   | 0.40938  |
| C | 6.0 | -8.31452 | 3.05909   | 0.05635  |
| C | 6.0 | -8.98625 | 4.19185   | -0.40867 |
| C | 6.0 | -8.49930 | 5.50091   | -0.23830 |
| C | 6.0 | -7.34965 | 5.71539   | 0.47039  |
| C | 6.0 | -6.62769 | 4.56174   | 0.84909  |
| O | 8.0 | -9.09247 | 6.55852   | -0.85029 |
| C | 6.0 | 5.89604  | -0.84417  | -0.10463 |
| C | 6.0 | 6.24387  | -2.27457  | 0.10949  |
| C | 6.0 | 7.37132  | -3.31002  | 0.12824  |
| C | 6.0 | 6.98138  | -4.86874  | 0.19783  |
| C | 6.0 | 7.89446  | -6.06435  | 0.07695  |
| C | 6.0 | 7.13327  | -7.43424  | -0.03316 |
| C | 6.0 | 8.23125  | -8.44351  | -0.15946 |
| C | 6.0 | 7.72778  | -9.86091  | -0.17926 |
| C | 6.0 | 8.96734  | -10.72643 | -0.23939 |
| C | 6.0 | 8.58211  | -12.18522 | -0.22282 |
| C | 6.0 | 9.83239  | -13.03318 | -0.27004 |
| H | 1.0 | 5.04199  | 1.34914   | 0.34105  |
| H | 1.0 | -1.09479 | 5.02107   | -0.29649 |
| H | 1.0 | 1.20727  | 5.04542   | -0.45533 |
| H | 1.0 | 0.04980  | 1.00437   | 0.11312  |
| H | 1.0 | -5.10238 | -1.30554  | 0.31308  |
| H | 1.0 | 0.91646  | -5.02265  | -0.35478 |
| H | 1.0 | -1.17197 | -5.01735  | -0.50389 |
| H | 1.0 | -0.06508 | -0.92766  | -0.03001 |
| H | 1.0 | -4.78245 | 2.95260   | 0.51308  |
| H | 1.0 | -5.96901 | 3.98496   | -1.81323 |
| H | 1.0 | -5.64519 | 6.22669   | -1.81266 |
| H | 1.0 | -3.82649 | 7.17658   | -0.36308 |
| H | 1.0 | -2.29918 | 5.77345   | 0.82325  |
| H | 1.0 | 2.27891  | 5.17493   | 1.25864  |
| H | 1.0 | 3.41684  | 7.09952   | 0.18869  |
| H | 1.0 | 5.78544  | 6.78281   | -0.54860 |
| H | 1.0 | 6.68318  | 4.43880   | -0.58564 |
| H | 1.0 | 5.10879  | 2.70500   | -0.84035 |
| H | 1.0 | 4.42020  | -2.85616  | 0.33276  |
| H | 1.0 | 5.65161  | -4.03349  | -1.87992 |
| H | 1.0 | 5.23768  | -6.43526  | -1.59162 |
| H | 1.0 | 3.83501  | -7.03918  | 0.40324  |

|   |     |          |           |          |
|---|-----|----------|-----------|----------|
| H | 1.0 | 2.12519  | -5.51269  | 0.93854  |
| H | 1.0 | -2.23148 | -5.22184  | 1.04462  |
| H | 1.0 | -3.43538 | -7.09849  | 0.11083  |
| H | 1.0 | -5.83072 | -6.72048  | -0.47556 |
| H | 1.0 | -6.68203 | -4.36746  | -0.51930 |
| H | 1.0 | -5.07718 | -2.66693  | -0.98091 |
| H | 1.0 | -6.42746 | 0.63991   | 0.93557  |
| H | 1.0 | -6.21934 | 0.28752   | -0.83659 |
| H | 1.0 | -5.58059 | 2.39067   | -1.15110 |
| H | 1.0 | -8.59653 | 2.06353   | -0.28090 |
| H | 1.0 | -9.80318 | 3.99940   | -1.07230 |
| H | 1.0 | -6.93464 | 6.73118   | 0.52587  |
| H | 1.0 | -5.65691 | 4.86361   | 1.27340  |
| H | 1.0 | -9.94559 | 6.26199   | -1.20423 |
| H | 1.0 | 6.37290  | -0.30903  | 0.71735  |
| H | 1.0 | 6.32285  | -0.50506  | -1.06314 |
| H | 1.0 | 5.80024  | -2.44874  | -0.86895 |
| H | 1.0 | 5.79934  | -2.41705  | 1.10489  |
| H | 1.0 | 7.91743  | -3.08137  | 1.02894  |
| H | 1.0 | 7.88534  | -3.12178  | -0.81048 |
| H | 1.0 | 6.65537  | -5.07333  | -0.79766 |
| H | 1.0 | 6.22689  | -5.10720  | 0.96345  |
| H | 1.0 | 8.56745  | -6.07662  | 0.92598  |
| H | 1.0 | 8.45854  | -5.96343  | -0.86241 |
| H | 1.0 | 6.52486  | -7.59784  | -0.93174 |
| H | 1.0 | 6.47069  | -7.64175  | 0.81867  |
| H | 1.0 | 8.91521  | -8.29459  | 0.67947  |
| H | 1.0 | 8.77392  | -8.23893  | -1.09248 |
| H | 1.0 | 7.08102  | -10.04448 | -1.04662 |
| H | 1.0 | 7.14197  | -10.07266 | 0.72233  |
| H | 1.0 | 9.61636  | -10.49243 | 0.61540  |
| H | 1.0 | 9.53965  | -10.48829 | -1.14642 |
| H | 1.0 | 7.93992  | -12.40684 | -1.08215 |
| H | 1.0 | 8.01023  | -12.40408 | 0.68569  |
| H | 1.0 | 10.40370 | -12.82394 | -1.18038 |
| H | 1.0 | 9.56572  | -14.09101 | -0.25686 |
| H | 1.0 | 10.47350 | -12.81993 | 0.59171  |

\$END
